# Supplementary material for: The Human PDZome 2.0: Characterization of a New Resource to Test for PDZ Interactions by Yeast Two-Hybrid
Source: MDPI journal article supplement (doi:10.3390/membranes13080737), 2023-08-17
Supplement: s1 [file s1]

## Supplementary Material

**Figure S1 Summary of the Yeast-Two-Hybrid raw data.** Summary of the PDZ interactions detected by Yeast-Two-Hybrid using the E6 protein C-terminal region of HPV16 wild type as bait. **(A)** Comparison of the interactions detected using the PDZome and the single PDZ collection of the PDZome 2.0 (as indicated). **(B)** Comparison of the interactions detected using the collection of tandems of the PDZome 2.0 and the correspondent PDZ taken in isolation in PDZome and PDZome 2.0 (as indicated). No interaction detected is indicated in red, positive interaction detected is indicated in blue. Numbers correspond to positive colonies / detected from  $n$  independent experiments.

**Table S1. Single PDZ domain constructs used to comprehensively map PDZ interactions.**

**Table S2. Tandem PDZ constructs used as preys to comprehensively map PDZ interactions.**

**Figure S1 Summary of the Yeast-Two-Hybrid raw data**

**A**

| PDZ domain | PDZome<br>Belotti et al, 2013 | PDZome 2.0 |
|------------|-------------------------------|------------|
| AHNAK      |                               | 1 / 3      |
| ARHGEF11   |                               | 1 / 3      |
| ARHGEF12   |                               | 2 / 3      |
| CASK       |                               | 0 / 3      |
| DFNB31_1   |                               | 1 / 3      |
| DLG1_1     |                               | 2 / 3      |
| DLG1_2     |                               | 3 / 3      |
| DLG1_3     |                               | 2 / 3      |
| DLG2_1     |                               | 2 / 3      |
| DLG2_2     |                               | 2 / 3      |
| DLG2_3     |                               | 2 / 3      |
| DLG3_2     |                               | 2 / 3      |
| DLG3_3     |                               | 2 / 3      |
| DLG4_1     |                               | 2 / 3      |
| DLG4_2     |                               | 3 / 3      |
| DLG4_3     |                               | 3 / 3      |
| DLG5_1     |                               | 1 / 3      |
| DVL1       |                               | 1 / 3      |
| FRMPD2_1   |                               | 2 / 3      |
| FRMPD4A    |                               | 0 / 3      |
| GORASP1    |                               | 1 / 3      |
| INADL_5    |                               | 0 / 3      |
| LIN7C      |                               | 1 / 3      |
| LRRC7      |                               | 0 / 3      |
| MAGI1_2    |                               | 2 / 3      |
| MAGI1_3    |                               | 1 / 3      |
| MAGI1_5    |                               | 2 / 3      |
| MAGI1_6    |                               | 1 / 3      |
| MAGI2_2    |                               | 3 / 3      |
| MAGI2_5    |                               | 2 / 3      |
| MAGI2_6    |                               | 1 / 3      |
| MAGI3_2    |                               | 3 / 3      |
| MAST1      |                               | 2 / 3      |
| MAST2      |                               | 3 / 3      |
| MPDZ_11    |                               | 1 / 3      |
| MPDZ_13    |                               | 1 / 3      |
| MPDZ_7     |                               | 1 / 3      |
| NHERF3_1   |                               | 2 / 3      |
| NHERF4_1   |                               | 1 / 3      |
| NOS1       |                               | 1 / 3      |
| PDLIM1     |                               | 0 / 3      |
| PDZRN3_1   |                               | 2 / 3      |
| PDZRN4_1   |                               | 1 / 3      |
| PTPN13_3   |                               | 1 / 3      |
| PTPN3      |                               | 3 / 3      |
| PTPN4      |                               | 3 / 3      |
| RGS12      |                               | 0 / 3      |
| RHPN1      |                               | 2 / 3      |
| SCRIB_1    |                               | 2 / 3      |
| SCRIB_2    |                               | 3 / 3      |
| SCRIB_3    |                               | 3 / 3      |
| SDCBP_1    |                               | 3 / 3      |
| SHANK3     |                               | 2 / 3      |
| SNTA1      |                               | 0 / 3      |
| SNTB1      |                               | 3 / 3      |
| SNTB2      |                               | 2 / 3      |
| SNX27      |                               | 1 / 3      |
| SYNJ2BP    |                               | 1 / 3      |
| TJP1_1     |                               | 1 / 3      |
| TX1B3      |                               | 1 / 3      |
| USH1C_2    |                               | 0 / 3      |

**B**

| PDZ domain  | PDZome 2.0<br>tandem PDZ | PDZome 2.0<br>single PDZ | PDZome<br>Belotti et al, 2013 |
|-------------|--------------------------|--------------------------|-------------------------------|
| APBA1_1-2   | 2 / 2                    |                          |                               |
| DLG1_1-2    | 1 / 2                    |                          |                               |
| DLG2_1-2    | 1 / 2                    |                          |                               |
| DLG3_1-2    | 1 / 2                    |                          |                               |
| DLG4_1-2    | 2 / 2                    |                          |                               |
| GRIP2_5-6   | 1 / 2                    |                          |                               |
| USH1C_1-2   | 1 / 2                    |                          |                               |
| GORASP2_1-2 | 1 / 2                    |                          |                               |

**Table S1 Single PDZ domain constructs used to comprehensively map PDZ interactions.**

| Single PDZ name    | Protein sequence                                                                                                             |
|--------------------|------------------------------------------------------------------------------------------------------------------------------|
| AHNAK              | EKEETTRELLLPNWQSGSHGLTIAQRDDGVFVQEVTQNSPAARTGVVKEGDQIV<br>GATIYFDNLQSGEVTQLLNTMGHHTVGLKLHRKGDRSPEPGQT                        |
| AHNAK2             | QEATEVTLKTEVEAGASGYSVTGGGDQGIFVKQVLKDSSAAKLFNLREGDQLLST<br>TVFFENIKYEDALKILQYSEPYKVQFKIRRQ                                   |
| APBA1_1            | EFKDVFIEKQKGEILGVVIVESGWGSILPTVIIANMMHGGPAEKSGKLNIGDQIMSI<br>NGTSLVGLPLSTCQSIKGLKNQSRVKLNIVR                                 |
| APBA1_2            | PPVTTVLIRRPDLRYQLGFSVQNGIICSLMRGGIAERGGVRVGHRIIEINGQSVVAT<br>PHEKIVHILSNAVGEIHMKTMPA                                         |
| APBA2_1            | NCKELQLEKHKGEILGVVVVESGWGSILPTVILANMMNGGPAARSGKLSIGDQIM<br>SINGTSLVGLPLATCQGIKGLKNQTQVKLNIVS                                 |
| APBA2_2            | PPVTTVLIKRPDLKYQLGFSVQNGIICSLMRGGIAERGGVRVGHRIIEINGQSVVAT<br>AHEKIVQALSNSVGEIHMKTMPAA                                        |
| APBA3_1            | DNCREVHLEKRRGEGLGVALVESGWGSLLPTAVIANLLHGGPAERSGALSIGDRL<br>TAINGTSLVGLPLAACQAAVRETKSQTSVTLSIVHS                              |
| APBA3_2            | PVTTAIIHRPHAREQLGFCVEDGHCSSLRGGIAERGGIRVGHRIIEINGQSVVATPH<br>ARIIELLTEAYGEVHIKTMPAATYRLLTGQ                                  |
| ARHGAP21           | GPKTVTLKRTSQGFGLTLRHFIVYPPESAIQFSYKDEENGNRGGKQRNRLEPMDTI<br>FVKQVKEGGPAFEAGLCTGDRIIKVNGESVIGKTYSQVIALIQNSDTTLELSVMPK<br>D    |
| ARHGAP23           | QGPRTLLEYKSPQDGFGLTLRHFIVYPPESAVHCSLKEEENGGRGGGSPRYRLEP<br>MDTIFVKNVKEDGPAHRAGLRTGDRLVKVNGESVIGKTYSQVIALIQNSDDTLEL<br>SIMPKD |
| ARHGEF11           | TGLVQRCVIIQKDQHGFGLTVSGDRIVLVQSVRPGGAAMKAGVKEGDRIIKVNGT<br>MVTNSSHLEVVKLIKSGAYVALTLLGSS                                      |
| ARHGEF12<br>(LARG) | TGLVQRCVIIQKDDNGFGLTVSGDNPVVFVQSVKEDGAAMRAGVQTGDRIIKVNG<br>TLVTHSNHLEVVKLIKSGSYVALTVQGRPPGS                                  |
| CARD11             | RGPGPSVQHTTLNGDSLTSQTLTLLGGNARGSFVHSVKGSLAEKAGLREGHQLLL<br>LEG CIRGERQSVPLDTCTKEEAHWTIQRCSGPVTLHYKV NHE                      |
| CARD14             | RRRPARRILSQVTMLAFQGDALLEQISVIGGNLTGIFIHRVTPGSAADQMALRPGT<br>QIVMVDYEASEPLFKAILEDTTLEEAVGLLRRVDGFCCLSVKVNTDGYKR               |
| CASK               | RVRLVQFQKNTDEPMGITLKMNELNHCIVARIMHGGMIHRQGLHVGDEIREING<br>ISVANQTVEQLQKMLREMRGSITFKIVPS                                      |
| CNKSRI             | EQKAVLEQVQLDSPLGLEIHTTSNCQHVSQVDTQVPTDSRLQIQPGDEVVQINEQ<br>VVVREERDMVGWPRKNMVRELLREPAGLSLVLKK                                |
| CNKSRI2            | SQSAHLEVIQLANIKPSEGLGMYIKSTYDGLHVITGTTENSPADRCKKIHAGDEVIQ<br>VNHQTVVGWQLKNLVNALREDPSGVILTLKKRPQSMLTSAP                       |
| CNKSRI3            | MSQCACLEEVHLNPNKPGEGGLGMYIKSTYDGLHVITGTTENSPADRSQKIHAGDEV<br>IQVNQQT VVGWQLKNLVKKLRENPTGVVLLLKKRPTGSFNFTAP                   |
| DEPTOR<br>(DEPDC6) | TPGAPYARKTFTIVGDAVGWGFVVRGSKPCHIQAVDPSGPAAAAGMKVCQFVVS<br>VNGNLVHVDYRTVSNLITGPRTIVMEVMEELE                                   |
| DFNB31_1           | GEVRLVSLRRAKAHEGLGFSIRGGSEHGVGIIYVSLVEPGSLAEKEGLRVGDQILRV<br>NDKSLARVTHAEAVKALKGSKKL VLSVYSAGRIPG                            |

|          |                                                                                                                            |
|----------|----------------------------------------------------------------------------------------------------------------------------|
| DFNB31_2 | GDRRSTLHLLQGGDEKKVNLVLGDGRSLGLTIRGGAHEYGLGIYITGVDPGSEAEG<br>SGLKVGQILEVNGRSFLNLHDEAVRLKSSRHLILTVKDVGRLPARTTVDETK<br>WIASSR |
| DFNB31_3 | TSTLVRVKKSAATLGIAIEGGANTRQPLPRIVTIQRGGSAHNCGQLKVGHVILEVN<br>GLTLRGKEHREAARIAEAFKTKDRDYIDFLVTEFN                            |
| DLG1_1   | EYEEITLERGNSGLGFSIAGGTDNPHIGDDSSIFITKIITGGAAAQDGRLRVNDCILR<br>VNEVDVRDVTHSKAVEALKEAGSIVRLYVKRRKPV                          |
| DLG1_2   | SEKIMEIKLIKGPGLGFSIAGGVGNQHIPGDNSIYVTKIIEGGAHKGDKLQIGDK<br>LLAVNNVCLEEVTHEEAVTALKNTSDFVYLKVAKPTSMYMN                       |
| DLG1_3   | DDEITREPRKVVLHRGSTGLGFNIVGGEDGEGIFISFILAGGPADLSGELRKGDRIIS<br>VNSVDLRAASHEQAAAALKNAGQAVTIVAQYRPEEYSRFEAKIHDREQMMNSS<br>ISS |
| DLG2_1   | EYEFEEITLERGNSGLGFSIAGGTDNPHIGDDPGIFITKIIPGGAAEDGRLRVNDICI<br>LRVNEVDVSEVSHSKAVEALKEAGSIVRLYVRRRRP                         |
| DLG2_2   | ETVVEIKLFGKPKGLGFSIAGGVGNQHIPGDNSIYVTKIIDGGAAQKDGRQLQVGDR<br>LLMVNNYSLEEVTHEEAVAILKNTSEVVYLKVGKPTTIY                       |
| DLG2_3   | EPRKVVLHKGSTGLGFNIVGGEDGEGIFVSFILAGGPADLSGELQRGDQILSVNGID<br>LRGASHEQAAAALKGAGQTVTIIAQYQPEDYARFEAKIH                       |
| DLG3_1   | DGMFKYEEIVLERGNSGLGFSIAGGIDNPHVPDDPGIFITKIIPGGAAAMDGRLGVN<br>DCVLRVNEVDVSEVVHSHRAVEALKEAGPVVRLVRRRRQP                      |
| DLG3_2   | ETIMEVNLLKGPKGLGFSIAGGIGNQHIPGDNSIYITKIIEGGAQKDGRQLQIGDRLL<br>AVNNTNLQDVRHEEAVASLKNTSDMVYLKVAKPGS                          |
| DLG3_3   | TREPRKIILHKGSTGLGFNIVGGEDGEGIFVSFILAGGPADLSGELRRGDRILSVNGV<br>NLRNATHEQAAAALKRAGQSVTIVAQYRPEEYSRFESK                       |
| DLG4_1   | EYEEITLERGNSGLGFSIAGGTDNPHIGDDPSIFITKIIPGGAAAQDGRLRVNDSILFV<br>NEVDVREVTHSAAVEALKEAGSIVRLYVMRRK                            |
| DLG4_2   | AEKVMEIKLIKGPGLGFSIAGGVGNQHIPGDNSIYVTKIIEGGAHKGDKRLQIGD<br>KILAVNSVGLEDVMHEDAVAALKNTYDVVYLKVAKPSNA                         |
| DLG4_3   | DIPREPRRIVHRGSTGLGFNIVGGEDGEGIFISFILAGGPADLSGELRKGDQILSVNG<br>VDLRNASHEQAAIALKNAGQTVTIIAQYKPEEYSRFEAK                      |
| DLG5_1   | ETEVEFERETEDIDLKALGFDMAEGVNEPCFPGDCGIFVTKVDKGSADGRLRVN<br>DWLLRINDVDLINKDKKQAIKALLNGEGAINMVVRRRKSLG                        |
| DLG5_2   | GKVVTPLHINLSGQKDSGISLENGVYAAAVLPGSPAAKEGSLAVGDRIVAINGIAL<br>DNKSLNECESLLRSCQDSLTLCLKVFPQSS                                 |
| DLG5_3   | GERRKDRPYVEEPRHVKVQKGSEPLGISIVSGEKGGIYVSKVTVGSIAHQAGLEYG<br>DQLLEFNGINLRSATEQQARLIIGQQCDTITILAQYNPHVHQLSSHSRS              |
| DLG5_4   | DANKKTLEPRVVFIIKKSQLELGVHLCGGNLHGVFVAEVEDDSPAKGPDGLVPGD<br>LILEYGSOLDVRNKTVEEVYVEMLKPRDGVRLKVQYRPEEFTKAKGLPGDS             |
| DVL1     | NIVTVTLNMERHHFLGISIVGQSNDRGDGGIYIGSIMKGGAVAADGRIEPPGDMLLQ<br>VNDVNFENMSNDDAVRVLREIVSQTGPISLTVAK                            |
| DVL2     | TMSLNITVTLNMEKYNFLGISIVGQSNERGDGGIYIGSIMKGGAVAADGRIEPPG<br>DMLLQVNDMNFENMSNDDAVRVLRLDIVHKPGPIVLTVAKCWDPS                   |
| DVL3     | SLNITVTLNMEKYNFLGISIVGQSNERGDGGIYIGSIMKGGAVAADGRIEPPGDMLL<br>QVNEINFENMSNDDAVRVLREIVHKPGPITLTVAKCWDPSPRG                   |

|           |                                                                                                                                                                                                                               |
|-----------|-------------------------------------------------------------------------------------------------------------------------------------------------------------------------------------------------------------------------------|
| FRMPD1    | PVRHTVKIDKDTLLQDYGFHISESLPLTVVAVTAGGSAHGKLFPGDQILQMNNEP<br>AEDLSWERAVDILREAEDSL SITVVRCTSGVPKSS                                                                                                                               |
| FRMPD2_1  | GREIVRVTLKRDPHRGFGFVINEGEYSGQADPGIFISSIIPGGPAEKAKTIKPGGQIL<br>ALNHISLEGFTFNMAVRMIQNSPDNIELIISQSK                                                                                                                              |
| FRMPD2_2  | SAGEIYFVELVKEDGTLGFSVTGGINTSVPYGGIYVKSIVPGGPAAKEGQILQGDR<br>LQVDGVILCGLTHKQAVQCLTGPQGVARLV LERRVPRS                                                                                                                           |
| FRMPD2_3  | TDGPKFEVKLKKNANGLGFSFVQMEKESCSHLKSDLVRIKRLFPGQPAEENGAIA<br>AGDIILAVNGRSTEGLIQEV LHLRGAPQEV TLLLCRP                                                                                                                            |
| FRMPD3    | EQLPAEILRQVTVHRDPYGFVAGSERPVVRSVRPGGPSENKLLAGDQIVAIN<br>EEDVSEAPRERLIELIRSAKEFIVLTVLHTHQS                                                                                                                                     |
| FRMPD4    | ESCQIIPAPRKVEMRRDPVLGFGFVAGSEKPVVRSVTPGGPSEGKLIPGDQIVMI<br>NDEPVSAAPRERVIDLVRSCKESILLTVIQPYPSPKS                                                                                                                              |
| GIPC1     | KGQRKEVEVFKSEDALGLTITDNGAGYAFIKRIKEGSVIDHIHLISVGDMIEAINGQ<br>SLLGCRHYEVARLLKELPRGRTFTLKLTEPRKA FDMISQ                                                                                                                         |
| GIPC2     | KGIEKEVN VYKSEDSLGLTITDNGVGYAFIKRIKDGGVIDSVKTICVGDHIESINGE<br>NIVGWRHYDVAKKLKELKKEELFTMKLIEPKKAFE                                                                                                                             |
| GIPC3     | RGETKEVEVTKTEDALGLTITDNGAGYAFIKRIKEGSIINRIEAVCVGDSIEAINDHS<br>IVGCRHYEVAKMLRELPKSQPFTLRLVQPKRA FDMIGQ                                                                                                                         |
| GOPC      | KKSQGVGPIRKVLLLKEDHEGLGISITGGKEHGVPI LISEIHPGQPADRCGGLHVGD<br>AILAVNGVNL RDTKHKEAVTILSQQRGEIEFEV VYVAPE                                                                                                                       |
| GORASP1   | MGLGVSAEQPAGGAEGFHLHGVQENSPAQQAGLEPYFDIITIGHSRLNKENDTL<br>KALLKANVEKPVKLEVFNMKTMRVREVEVPSNMWGGQGLLGASVRFC SFRRA<br>SEQVWHVLDVEPSSPAALAGLRPYTDYVVGSDQILQESEDFTLIESHEGKPLKLM<br>VYNSKSDSCREVTVTPNAAWGGEGSLGCGIGYGYLHRIPTQPPS    |
| GORASP2   | GMGSSQSVEIPGGGTEGYHVLRVQENSPGHRAGLEPFFDFIVSINGSRLNKDNDTL<br>KDLLKANVEKPVKMLIYSSKTLELRETSVTPSNLWGGQGLLGVSIRFCSFDGANE<br>NVWHVLEVESNSPAALAGLRPHSDYIIGADTMNESEDLFSLIETHEAKPLKLYVY<br>NTD TDNCREVIITPNSAWGGEGSLGCGIGYGYLHRIPTRPFE |
| GRASP     | EQQRKVL TLEKEDNQTFGFEIQT YGLHHREEQRVEMVTFVCRVHESSPAQLAGLT<br>PGDTIASVNGLNVEGIRHREIVDI IKASGNVLRLETLYGTSIR                                                                                                                     |
| GRID2IP_1 | MATTATPATNQGWPEDFGFR LGGSGPCFVLEVAKGSSAHAGGLRPGDQILEVEGL<br>AVGGLSRERLVRLARRCPRVPPSLGVLPAPDG                                                                                                                                  |
| GRID2IP_2 | GPGGARRTVRVYKGNKSFGFTLRGHGPVWIESVLP GSPADNAALKSGDRILFLNG<br>LDMRNC SHDKVV SMLQGS GAMPTLVVEEGLVPFASDSDSLDSPN                                                                                                                   |
| GRIP1_1   | EFKGSTVVELMKKEGTTLGLTVSGGIDKDGKPRVSNLRQGGIAARSDQLDVGDYI<br>KAVNGINLAKFRHDEIISLLKNVGERVVLEVEYELP                                                                                                                               |
| GRIP1_2   | SVIFRTVEVTLHKEGNTFGFVIRGGAHDDR NKS RPPVITCVRPGGPADREGTIKPG<br>DRLLSVDGIRLLGTTHAEAMSILKQCGQEAALLIEYDVS                                                                                                                         |
| GRIP1_3   | DSVATASGPLLVEVAKTPGASLGVALTTSMCCNKQVIVIDKIKSASIADRCGALHV<br>GDHILSIDGTSMEYCTLA EATQFLANTTDQVKLEILPHHQTRLALKG                                                                                                                  |
| GRIP1_4   | QVVHTETTEVVL TADPVTGFGIQLQGSVFATETLSSPPLISYIEADSPAERCGLQI<br>GDRVMAINGIPTEDSTFE EASQLLRDSSITSKVTLEIEFDVAESVIP                                                                                                                 |
| GRIP1_5   | ESVIPSSGTFHVKL PKKHNVELGITISSPSSRKPGDPLVISDIKKGSVAHRTGTLELG<br>DKLLAIDNIRLDNCSMEDAVQILQQCEDLVKLKIRKDED                                                                                                                        |

|          |                                                                                                                                            |
|----------|--------------------------------------------------------------------------------------------------------------------------------------------|
| GRIP1_6  | SSGAIHYTVELKRYGGPLGITISGTEEPFDPIISSLTKGGLAERTGAIHIGDRILAINSS<br>SLKGKPLSEAIHLLQMAGETVTLKIKKQTDASASS                                        |
| GRIP1_7  | SPTPVELHKVTLYKDSMEDFGFSVADGLLEKGVYVKNIRPAGPGDLGGLKPYD<br>RLLQVNHVTRTRDFDCCLVVPLIAESGNKLDLVISRNP                                            |
| GRIP2_1  | EEFRGITVVELIKKEGSTLGLTISGGTDKDGKPRVSNLRPGGLAARSDLLNIGDYIR<br>SVNGIHLTRLRHDEIITLLKNVGERVVLEVEYELPP                                          |
| GRIP2_2  | ENNPRIISKTVDVSLYKEGNSFGFVLRGGAHEDGHKSRPLVLTYYVRPGGPADREGS<br>LKVGDRLLSVDGIPLHGASHATALATLRQCSHEALFQVEYDVATPDTVANASG                         |
| GRIP2_3  | DTVANASGPLMVEIVKTPGSALGISLTTTSLRNKSVITIDRIKPASVVDRSGALHPG<br>DHILSIDGTSMEHCSLLEATKLLASISEKVRLEILPVPQSQRPRLR                                |
| GRIP2_4  | GGQIVHTETTEVVLCDPLSGFGLQLQGIFATETLSSPPLVCFIEPDSPAERCGLL<br>QVGDRVLSINGIATEDGTMEEANQLLRDAALAHKVLEVEFDVAES                                   |
| GRIP2_5  | DVAESVIPSSGTFHVKLPPKRSVELGITISSASRKRGEPLIISDIKKGSVAHRTGTLEP<br>GDKLLAIDNIRLDNCPMEDAVQILRQCEDLVKLKIRKDED                                    |
| GRIP2_6  | TTGAVSYTVELKRYGGPLGITISGTEEPFDPIVISGLTKRGLAERTGAIHVGDRILAI<br>NNVSLKGRPLSEAIHLLQVAGETVTLKIKKQLDR                                           |
| GRIP2_7  | PTPLEMHKVTLHKDPMRHDFGFSVSDGLLEKGVYVHTVRPDGPAHRGGLQPFDR<br>VLQVNHVTRTRDFDCCLAVPLLAEGDVLLELIISRKP                                            |
| HTRA1    | TESHDRQAKGKAITKKKYIGIRMMSLTSSKAKELKDRHRDFPDVISGAYIIEVIPDT<br>PAEAGGLKENDVIISINGQSVVSANDVSDVIKRESTLNMVVRGNEDIMITVPIPEI<br>DP                |
| HTRA2    | SGSQRRYIGVMMLTLSPSILAEQLREPSFPDVQHGVLIHKVILGSPAHRAGLRPGD<br>VILAIGEQMVQNAEDVYEAVRTQSQLAVQIRRGRETLTLYVTPEVTE                                |
| HTRA3    | KKRFIGIRMRTITPSLVDELKASNPDFPEVSSGIYVQEVAPNSPSQRGGIQDGDIIVK<br>VNGRPLVDSELQEAVLTESPLLLEVRRGNDDLLFSIAPEVVM                                   |
| HTRA4    | HQMKGKAFSNKKYLGLQMLSLTVPLSEELKMHYPDFPDVSSGVYVCKVVEGTA<br>AQSSGLRDHDVIVNINGKPITTTTDDVVKALDSDSLMAVLRGKDNLLLTVIPETIN                          |
| IL16_1   | QASVISNIVLMKGQAKGLGFSIVGGKDSIYGPIGIYVKTI FAGGAAAADGRLQEGD<br>EILELNGESMAGLTHQDALQFKQAKKGLLTLTVRTRLTAP                                      |
| IL16_2   | STAKPNYRIMVEVSLQKEAGVGLGIGLCVVPYFQCISGIFVHTLSPGSVAHLDGRL<br>RCGDEIVEISDSPVHCLTLNEVYTILSHCDPGVPPIIVSRHPDPQVSEQQLKE                          |
| IL16_3   | KQLDGIHVTLHKEEGAGLGFSLAGGADLENKVITVHRVFPNGLASQEGTIQKGNE<br>VLSINGKSLKGTTHHDALAILRQAREPRQAVIVTRKLTPE                                        |
| IL16_4   | MPDLNSSTDASAASASASDVSVESTAEATVCTVTLEKMSAGLGFSLGGKGS LHG<br>DKPLTINRIFKGAASEQSETVQPGDEILQLGGTAMQGLTRFEAWNIIKALPDGPVTI<br>VIRRKSLQSKETTAAGDS |
| InaDI_1  | KLGNEDFNSVIQQMAQGRQIEYIDIERPSTGGLGFSVVALRSQNLGKVDIFVKDVQ<br>PGSVADRDQRLKENDQILAINHTPLDQNISHQQAIALQLQTTGSLRLIVAREPVHT<br>KSSTS              |
| InaDI_10 | EPRTVEINRELSDALGISIAGGRGSPLGDIPVFIAMIQASGVAARTQKLKVGDRIVSI<br>NGQPLDGLSHADVNNLLKNAYGRIILQVVADTN                                            |
| InaDI_2  | PETVCWGHVEEVELINDGSGLGFGIVGGKTS GVVVVRTIVPGGLADRDGRLQTGDH<br>ILKIGGTNVQGMTSEQVAQVLRNCGNSVRMLVARDPAGDISVT                                   |

|                 |                                                                                                                           |
|-----------------|---------------------------------------------------------------------------------------------------------------------------|
| InaDl_3         | SLFETYNVELVRKDGQSLGIRIVGYVGTSHTEASGIYVKSIIIPGSAAYHNGHIQVN<br>DKIVAVDGVNIQGFANHDVVEVLRNAGQVVHLTLVRRKTSSSTSPLEPPSDRGT       |
| InaDl_4         | DTQIADDAELQKYSKLLPIHTLRLGVEVDSFDGHHYISSIVSGGPVDTLGLLQPEDE<br>LLEVNGMQLYGKSRREAVSFLKEVPPFTLVCCRRLFDDEASVDEPRR              |
| InaDl_5         | DDGELALWSPEVKIVELVKDCKGLGFSILDYQDPLDPTRSVIVIRSLVADGVAERS<br>GGLLPGDRLVSVNEYCLDNSTLAEAVEILKAVPPGLVHLGICKPLVEDNEEE          |
| InaDl_6         | PNFSHWGPPRIVEIFREPNSVLGISIVGGQTVIKRLKNGEELKGIFIKQVLEDSPAGK<br>TNALKTGDKILEVSGVDLQNASHSEAVEAIKNAGNPVVFIVQSLSSTPRVIP        |
| InaDl_7         | DAFTDQKIRQRYADLPGELHIIIELEKDKNGLGLSLAGNKDRSRMSIFVVGINPEGP<br>AAADGRMRIGDELLEINNQLYGRSHQNASAIKTAPSKVKLVFIRNEDAVNQMA<br>VTP |
| InaDl_8         | PATCPIVPGQEMIIEISKGRSGLGLSIVGGKDTPLNAIVIHEVYEEGAAARDGRLWA<br>GDQILEVNGVDLRNSSHEEAITALRQTPQKVRLVVYRDEAHYRDEENLE            |
| InaDl_9         | EIIPVDLQKKAGRGLGLSIVGKRNGSGVFISDIVKGGAADLDGRLIQGDQILSVNG<br>EDMRNASQETVATILKCAQGLVQLEIGRLR                                |
| INTU            | KEQLKLEVLVGIIHQTKWSWRRTGKQGDGERLVVHGLLPGGSAMKSGQVLIGD<br>VLVAVNDVDVTTENIERVLSCIPGPMQVKLTFENAYDVKRETSHPRQK                 |
| LAP2<br>(Erbin) | GHELAKQEIRVRVEKDPELGFSISGGVGGRGNPFRPDDDGIFVTRVQPEGPASKLL<br>QPGDKIIQANGYSFINIEHGQAVSLLKTFQNTVELIIVREVSS                   |
| LDB3            | MSYSVTLTGPGPWGFRLQGGKDFNMPLTISRITPGSKAAQSQLSQGDLVVAIDGV<br>NTDTMTHLEAQNKIKSASYNLSLTLQKSKR                                 |
| LIMK1           | PGSHLPHTVTLVSIPASSHGKRGLSVSIDPPHGGPGCGTEHSHTVRVQGVDPGCMS<br>PDVKNSIHVGDRILEINGTPIRNVPLDEIDLLIQETSRLQLTLEHDPHDTLGHGLGP     |
| LIMK2           | QEQLPYSVTLISMPATTEGRRGFSVSVESACSNYATTVQVKEVNRMHISPNNRNAI<br>HPGDRILEINGTPVRTLRVEEVEDAISQTSQTLQLLIEHDPVSQRDLQLR            |
| LIN7A           | SEGHSHPRVVVELPKTDEGLGFNVMGGKEQNSPIYISRIIPGGVAERHGGGLKRGDQL<br>LSVNGVSVEGEHHEKAVELLKAAKDSVKLVVRYTPK                        |
| LIN7B           | SEGAHPRVVVELPKTDEGLGFNIMGGKEQNSPIYISRVIPGGVADRHGGGLKRGDQ<br>LLSVNGVSVEGEQHEKAVELLKAAQGSVKLVVRYTPR                         |
| LIN7C           | SEGHSHPRVVVELPKTEEGLGFNIMGGKEQNSPIYISRIIPGGIADRHGGGLKRGDQLL<br>SVNGVSVEGEHHEKAVELLKAAQGVKLVVRYTPK                         |
| LMO7            | QFSDMRISINQTPGKSLDFGFTIKWDIPGIFVASVEAGSPAEFSQLQVDDEIIAINNT<br>KFSYNDSKEWEEAMAKAQETGHLVMDVRRYK                             |
| LNx1_1          | PRLYHLIPDGEITSIKINRVDPSLSIRLVGGSETPLVHIIIQHIIYRDGVIARDGRLLP<br>GDIILKVNGMDISNVPHNYAVRLLRQPCQVLWLTVMREQKFRSRNNGQAPD        |
| LNx1_2          | DAYRPRDDSFHVILNKSSPEEQLGIKLVRKVDEPGVFIFNVLDGGVAYRHGQLEEN<br>DRVLAINGHDLRYGSPESAHLIQASERRVHLVVSQRQVRQRSPD                  |
| LNx1_3          | TITCHEKVVNIIQKDPGESLGMTVAGGASHREWDLPIYVISVEPGGVISRDGRIKTG<br>DILLNVDGVELTEVSRSEAVALLKRTSSSIVLKALEVKEYE                    |
| LNx1_4          | RCLYNCKDIVLRRNTAGSLGFCIVGGYEEYNGNKPFFIKSIVEGTPAYNDGRIRCG<br>DILLAVNGRSTSGMIHACLARLLKELKGRITLTIVSWPGT                      |

|         |                                                                                                                                       |
|---------|---------------------------------------------------------------------------------------------------------------------------------------|
| LNx2_1  | PLSLPEGEITTEIHRSNPYIQLGISIVGGNETPLINIVIQEVYRDGVIARDGRLLAGD<br>QILQVNNYNISNVSHNYARAVLSQPCNTLHLTVLRERRFGNRAHN                           |
| LNx2_2  | REEIFQVALHKRDSGEQLGIKLVRRTDEPGVFILDLLEGGLAAQDGRLLSSNDRVLA<br>INGHDLKYGTPELAAQIIQASGERVNLTIARPGKPQ                                     |
| LNx2_3  | TQCVTCQEKHITVKKEPHESLGMTVAGGRGSKSGELPIFVTSVPPHGCLARDGRIK<br>RGDVLLNINGIDLTLNLSHSEAVAMLKASAASPAVALKALEVQIVEE                           |
| LNx2_4  | PSTLHSDHIVLRRSYLGSWGFISIVGGYEENHTNQPFIFTIVLGTPAYYDGRLLKC<br>GDMIVAVNGLSTVGMSSHSAVLPMLKEQRNKVTLTVICWPGS                                |
| LRRC7   | EQFCVRIEKNPGLGFSISGGISGQGNPFKPSDKGIFVTRVQPDGPASNLLQPGDKIL<br>QANGHSFVHMEHEKAVLLLSKFQNTVDLVIQRELT                                      |
| MAGI1_1 | MSKVIQKKNHWTSRVHECTVKRGPQGELGVTVLGGAEHGEFPYVGAVAAVEAA<br>GLPGGGEGPRLGEGELLLEVQGVVRVSGLPRYDVLGVIDSCKEAVTFKAVRQGG                       |
| MAGI1_2 | KPFFTRNPSELKGKFIHTKLKSSRGFGFTTVVGGDEPDEFLQIKSLVLDGPAALDG<br>KMETGDVIVSVNDTCVLGHTHAQVVKIFQSIPIGASVDLELCRGYPLPFDPPDPNT<br>SLVTSVAILDKEP |
| MAGI1_3 | QPELITVHIVKGPMGFGFTIADSPGGGGQVRVKQIVDSPRCRGLKEGDLIVEVNKKN<br>VQALTHNQVVDMLVECPKGSEVTLLVQRGGLP                                         |
| MAGI1_4 | DYQEQDIFLWRKETGFGFRILGGNEPGEPIYIGHIVPLGAADTDGRLRSGDELICVD<br>GTPVIGKSHQLVVQLMQQAAKQGHVNLTVRRKVVS GP                                   |
| MAGI1_5 | GSGVVSTVVQPYDVEIRRGNEGFGFVIVSSVSRPEAGTTFGNACVAMPHKIGRIIE<br>GSPADRCGKLKVGDRILAVNGCSITNKS HSDIVNLIKEAGNTVTLRIIPGDESSN                  |
| MAGI1_6 | QEQDFYTVELERGAKGFGFSLRGGREYNMDLYVLRLAEDGPAERCGKMRIGDEI<br>LEINGETTKNMKHSRAIELIKNGGRRVRLFLKRGDGSVP                                     |
| MAGI2_1 | MSKSLKKKSHWTSKVHESVIGRNPEGQLGFELKGAENGQFPYLGEVKPGKVAY<br>ESGSKLVSEELLLEVNETPVAGLTIRDVLAVIKHCKDPLRLKCVKQGG                             |
| MAGI2_2 | KPLFTRDASQLKGTFLSTTLKKS NMGFGFTIIGGDEPDEFLQVKSVIPDGPA AQDG<br>KMETGDVIVYINEVCVLGHTHADVVKLFQSVPIGQSVNLVLCRGYPLPFDPEDPA<br>NS           |
| MAGI2_3 | QAEMLTLTIVKGAQGFGTIADSPTGQVRVKQILDIQGCPGLCEGDLIVEINQQNVQ<br>NLSHTEVVDILKDCPIGSETSLIHRG                                                |
| MAGI2_4 | PDYKELDVHLRRMESGFGFRILGGDEPGQPILIGAVIAMGSADRDGRLHPGDEL V<br>YVDGIPVAGKTHRYVIDLMHHAARNGQVNLTVRRKVLCG                                   |
| MAGI2_5 | SLQTSDVVIHRKENEGFGFVISSLNRPESGSTITVPHKIGRIIDGSPADRC AKLKVG<br>DRILAVNGQSIINMPHADIVKLIK DAGLSVTLRIIPQEELNSPTS                          |
| MAGI2_6 | QDFDYFTVDMEKGAKGFGFSIRGGREYKMDLYVLRLAEDGPAIRNGRMRVGDQI<br>IEINGESTRDMTHARAIELIKSGGRRVRLLLKRG T                                        |
| MAGI3_1 | MSKTLKKKKHWLSKVQECAVSWAGPPGDFGAEIRGGAERGEFPYLGR LREEPGG<br>GTCCVVSGKAPSPGDVLLLEVNGTPVSGLTNRDTLAVIRHFREP IRLKTVKPGKVIN<br>KDLR         |
| MAGI3_2 | TRDPSQLKGVLV RASLKKSTMGFGFTIIGGDRPDEFLQVKNVLKDGPAAQDGKIA<br>PGDVIVDINGNCVLGHTHADVVQMFQLVPVNQYVNLTLCRGYPLPDDSEDP                       |
| MAGI3_3 | SQPELV TIPLIKGPKGFGFAIADSPTGQKVKMILDSQWCQGLQKGDIKEIYHQN VQ<br>NLTHLQVVEVLKQFPVGADVPLLLIRG                                             |
| MAGI3_4 | EDKPPNTKDL DVFLRKQESGFGFRVLGGDGPDQSIYIGAIPLGAAEKDGR LRAAD<br>ELMCIDGIPVKGKSHKQVLDLMTTAARNGHVLLTVRRKIFYGEK                             |



|         |                                                                                                                                |
|---------|--------------------------------------------------------------------------------------------------------------------------------|
| MAGI3_5 | QEPYDVVLQRKENEGFGFVILTSTKNKPPPGVIPHKIGRVIEGSPADRCGKLKVG DHI<br>SAVNGQSIVELSHDNIVQLIKDAGVTVTLTVIAEEEEHH                         |
| MAGI3_6 | NQNLGCYPVELERGPRGFGFSLRGGKEYNMGLFILRLAEDGPAIKDGRHVG DQIV<br>EINGEPTQGITHTRAIELIQAGGNKVLLLLRPGT                                 |
| MAGIX   | SQASGHFSVELVRGYAGFGLTLGGGRDVAGDTPLAVRGLLKDGPAQRCGRLEV G<br>DVVLHINGESTQGLTHAQAVIRIRAGGPQLHLVIRRPLET                            |
| MAST1   | RSPITIQRSGKKYGFTLRRAIRVYMGD TDVYSVHHIVWHVEEGGPAQEAGLCAGDL<br>ITHVNGEPVHGMVHPEVVVELILKSGNKVA VTTTPFEN                           |
| MAST2   | RPPIIIHRAGKKYGFTLRRAIRVYMGDS DVYTVHHMVWHVEDGGPASEAGLRQGD<br>LITHVNGEPVHGLVHTEVVVELILKSGNKVA ISTTPLEN                           |
| MAST3   | RPPIVIHSSGKKYGFS LRRAIRVYMGDS DVYTVHHVWVSVEDGSPAQEAGLRAGDL<br>ITHINGESVLGLVHMDVVELLLKSGNKISLR TTALEN                           |
| MAST4   | QPIVIHSSGKNYGFTIRAIRVYVGDS DIYTVHHIVWNVEEGSPACQAGLKAGDLIT<br>HINGEPVHGLVHTEVIELLLKSGNKVSIT TTPFENTS                            |
| MLLT4   | RKEPEIITVTLKKQNGMGLSIVA AKGAGQDKLGIYVKSVVKGGAADVDGRLAAG<br>DQLLSVDGRSLVGLSQERAAELMTRTSS VVTLEVAKQGAIIYH                        |
| MPDZ_1  | DEFDQLIKNMAQGRHVEVFELLKPPSGGLGFSVVG LRSENRGELGIFVQEIQEGSV<br>AHRDGR LKETDQILAINGQALDQTITHQQAISILQKAKDTVQLVIARGSLPQLVS          |
| MPDZ_10 | PGCETTIEISKGR TGLGLSIVGGSDTLLG AIIHEVYEEGAACKDGRLWAGDQILEV<br>NGIDLRKATHDEAINVLRQTPQRVRLTLYRDEAPYK                             |
| MPDZ_11 | DTLTIELQKKPGKGLGLSIVGKRNDTG VFVSDIVKGGIADADGRLMQGDQILMVN<br>GEDVRNATQEAVAALLKCSLGTVTLEVGRIKAGP                                 |
| MPDZ_12 | QGLRTVEMKKGP TDSLGISIAGGVGSPLGDVPIFIAMMHPTGVAAQTQKL RVGDR<br>IVTICGTSTEGMTHTQAVNLLKNASGSIEMQVVAGGD                             |
| MPDZ_13 | PPQCKSITLERGPDGLGFSIVGGYGS PHGDLPIYVKTVFAKGAASEDGRLKRGDQII<br>AVNGQSLEGVTHEEAVAILKRTKGTVTLMVLS                                 |
| MPDZ_2  | HSNPVHWQHMETIELVNDGSGLGFGIIGG KATGVIVKTILPGGVADQHGRLCSGD<br>HILKIGD TDLAGMSSEQVAQVLRQCGNRVKLMIARGAIEERT                        |
| MPDZ_3  | EESETFDVELTKNVQGLGITIAGYIGDKKLEPSGIFVKSITKSSAVEHDGRIQIGDQII<br>AVDGTNLQGFTNQQAVEVLRHTGQT VLLTLMRRGMKQE                         |
| MPDZ_4  | NYEIVVAHVSKFSENSGLGISLEATVGH HFIRSVLPEGPVGHSGKLFSGDELLEVN<br>GITLLGENHQDVVNILKELPIEVTMVCCR T                                   |
| MPDZ_5  | QAPLAMWEAGIQHIELEKSGSKGLGFS ILDYQDPIDPASTVIIIRSLVPGGIAEKDGRL<br>LPGDRLMFVNDVNLENSLEEAVEALKGAPSGTVRIGVAKPLPLSPEE                |
| MPDZ_6  | QNVSKESFERTINIAKGNSSLGMTVS ANKDGLGMIVRSIIHGGAISRDGRIAIGDCIL<br>SINEESTISVTNAQARAMLRHSLIGPD IKITYVPAEHLEEFKISLGQQS              |
| MPDZ_7  | TAYSNNQNPRRVELWREPSKSLGISIVGGRGMGSRLSNGEVMRGIFIKHVLEDSP<br>AGKNGTLKPGDRIVEVDGMDLRDASHEQAVEAIRKAGNPVVFVMVQSIINRP                |
| MPDZ_8  | DKEDEFGYSWK NIRERYGTLTGELHMIELEKGHSGLGLSLAGNKDRSRMSVFIVG<br>IDPNGAAGKDGRLQIADELLEINGQILYGRSHQNASSIIKCAPSKVKIIFIRNKDAVN<br>QMAV |
| MPDZ_9  | PTVTTSDAAVDLSSFKNVQHLELPKDQGG LGIAISEEDTLSGVIIKSLTEHGVAATD<br>GRLKVG DQILAVDDEIVVGYPIEKFISLLKTAKMTVKLTIHAENPDSQAVPS            |

|                        |                                                                                                                |
|------------------------|----------------------------------------------------------------------------------------------------------------|
| MPP1                   | VRLIQFEKVTEEPMGITLKLNEKQSCTVARILHGGMIHRQGS�HVGDILEINGTN<br>VTNHSVDQLQKAMKETKGMISLKVIPNQQ                       |
| MPP2                   | DAVRMVGIRKTAGEHLGVTFRVEGGELVIARILHGGMVAQQGLLHVGDIIKEVN<br>GQPVGSDPRALQELLRNASGSVILKILPSYQE                     |
| MPP3                   | DNIDEDFDEESVKIVRLVKNKEPLGATIRDEHSGAVVVARIMRGGAADRSGLVH<br>VGDELREVNGIAVLHKRPDEISQILAQSQGSITLKIIPATQEED         |
| MPP4                   | PDNIPESSEAMRIVCLVKNQQPLGATIKRHEMTGDILVARIHGGLAERSGLLYAG<br>DKLVEVNGVSVEGLDPEQVIHILAMSRGTIMFKVVPVSDPPVNS        |
| MPP5                   | TDERVYESIGQYGGGETVKIVRIEKARDIPLGATVRNEMDSVIISRIVKGGAAEKSGL<br>LHEGDEVLEINGIEIRGKDVNEVFDLLSDMHGTLTFVLIPSQ       |
| MPP6                   | DAIRILGIHKRAGEPLGVTFRVENNDLVIARILHGGMIDRQGLLHVGDIIKEVNGHE<br>VGNNPKELQELLKNISGSVTLKILPS                        |
| MPP7                   | DPVLPPMPEDIDDEEDSVKIIRLVKNREPLGATIKKDEQTGAIVARIMRGGAADRS<br>GLIHVGDELREVNGIPVEDKRPEEIIQILAQSQGAITFKIIPGSKEET   |
| MYO18A                 | TLRELELQRRPTGDFGFSLRRTTMLDRGPEGQACRRVVHFAEPGAGTKDLALGLV<br>PGDRLVEINGHNVESKSRDEIVEMIRQSGDSVRLKVQP              |
| NHERF_1<br>(SLC9A3R1)  | PLPRLCCLEKGPNGYGFHLHGEKGKLGQYIRLVEPGSPAEEKAGLLAGDRLVEVNG<br>ENVEKETHQQVVSRIRAALNAVRLLVDPETDEQ                  |
| NHERF_2                | EQRELPRRLCTMKKGPSGYGFNLHSDKSKPGQFIRSVDPDSPAEEASGLRAQDRIVE<br>VNGVCMEGKQHGDVVS AIRAGGDETCLLVVDRETDE             |
| NHERF2_1<br>(SLC9A3R2) | PRLCRLVRGEQGYGFHLHGEKGRRGQFIRRVEPGSPAEEAALRAGDRLVEVNGV<br>NVEGETHHQVVQRIKAVEGQTRLLVVDQE                        |
| NHERF2_2               | GPLRELPRRLCHLRKGPQGYGFNLHSDKSRPGQYIRSVDPGSPAARSGLRAQDRLI<br>EVNGQNVEGLRHAEVVASIKAREDEARLLVDPETDEHFKR           |
| NHERF3_1<br>(PDZK1)    | TSTFNPRECKLSKQEGQNYGFFLRIEKDTEGHLVRVVEKCSPAEKAGLQDGDRVL<br>RINGVFVDKEEHMQVVDLVRKSGNSVTLLVLDGDSYEKAVKTRVDLKELGQ |
| NHERF3_2               | QPRLCYLKKEGGSYGFSLKTVQGKKGVYMTDITPQGVAMRAGVLADDHLIEVNG<br>ENVEDASHEEVVEKVKKSGSRVMFLLVDKETDKRHVEQK              |
| NHERF3_3               | PHQPRIVEMKKGSNGYGFYLRAGSEQKGQIIKDIDSGSPAEEAGLKNNDLVVAVN<br>GESVETLDHDSVEMIRKGGDQTSLLVVDKETDNMYR                |
| NHERF3_4               | KPKLCRLAKGENGYGFHLNAIRGLPGSFIKEVQKGGPADLAGLEDEDVIIIEVNGV<br>NVLDEPYEKVVDRIQSSGKNVTLLVCGKKA                     |
| NHERF4_1<br>(PDZD3)    | DPYDPWSLERPRFCLLSKEEGKSFGFHLQQELGRAGHVVCRVDPGTSAQRQGLQE<br>GDRILAVNNDVVEHEDYAVVVRIRASSPRVLLTVLARHAHDVARAQLGED  |
| NHERF4_2               | RPRLCHIVKDEGGFGFSVTHGNQGPFWLVLSTGGAAERAGVPPGARLLEVNGVS<br>VEKFTHNQLTRKLWQSGQQVTLLVAGPEVEEQCR                   |
| NHERF4_3               | TKPRCLHLEKGPQGFGFLLREEKGLDGRPGQFLWEVDPGLPAKKAGMQAGDRLV<br>AVAGESVEGLGHEETVSRIQQQGSCVSLTVVDPE                   |
| NHERF4_4               | GSRQCFLYPGPGGSYGFRLSCVASGPRLFISQVTPGGSAAARAGLQVGDVILEVNGY<br>PVGGQNDLERLQQLPEAEPLCLKLAARSLR                    |
| NOS1                   | QQIQPNVISVRLFKRKVGGLGFLVKERVSKPPVIISDLIRGGAAEQSGLIQAGDIILA<br>VNGRPLVDLSYDSALEVLRGIASETHVVLILRGPE              |

|          |                                                                                                                                  |
|----------|----------------------------------------------------------------------------------------------------------------------------------|
| PARD3_1  | PNFSLDDMVKLVEVPNDGGPLGIHVVPFSARGGRTLGLLVKRLEKGGKAEHENLF<br>RENDCIVRINDGDLRNRFEQAQHMFRQAMRTPIIWFHVPAANKEQYEQLSQS                  |
| PARD3_2  | KKIGKRLNIQLKKGTEGLGFSITSRDVTIGGSAPIYVKNILPRGAAIQDGRLLKAGDR<br>LIEVNGVDLVGKSQEEVVSLLRSTKMEGTVSLLVFRQEDA                           |
| PARD3_3  | GTREFLTFEVPLNDSGSAGLGVSVKGNRSKENHADLGIFVKSIINGGAASKDGRLR<br>VNDQLIAVNGESLLGKTNQDAMETLRRSMSTEGNKRGMQLIVARRIS                      |
| PARD3B_1 | QTELLTSPRTKDTLSDMTRTVEISGEGGPLGIHVVPFFSSLSGRILGLFIRGIEDNSRS<br>KREGLFHENECIVKINNVDLVDKTFQAQDVFRQAMKSPSVLLHVLPPQNREQYE<br>KS      |
| PARD3B_2 | NKNAKKIKIDLKKGPEGLGFTVVTRDSSIHGPGPIFVKNILPKGAAIKDGRLLQSGDR<br>ILEVNGRDVTGRTQEELVAMLRSTKQGETASLVIARQEG                            |
| PARD3B_3 | ETSEQLTFEIPLNDSGSAGLGVSLLKGNKSRETGTDLGIFIKSIHGGAAFKDGRLRM<br>NDQLIAVNGESLLGKSNHEAMETLRRSMMEGNIRGMQLVILRRPER                      |
| PARD6A   | PETHRRVRLHKHGS DRPLGFYIRDGMSVRVAPQGLERVP GIFISRLVRGGLAESTG<br>LLAVSDEILEVNGIEVAGKTL DQVTDMMVANSHNLIVTVKPANQR                     |
| PARD6B   | DFRPVSSIIDVDILPETHRRVRLYKYGTEKPLGFYIRDGSSVRVTPHGLEKVP GIFIS<br>RLVPGGLAQSTGLLAVNDEVLEVNGIEVSGKSLDQVTDMMIANSRNLIITVRPAN<br>QR     |
| PARD6G   | RPVSSIIDVDLVPETHRRVRLHRHGCEKPLGFYIRDGASVRVTPHGLEKVP G IFISR<br>MVPGGLAESTGLLAVNDEVLEVNGIEVAGKTL DQVTDMMIANSHNLIVTVKPAN<br>QRN    |
| PCLO     | NGKTMHYIFPHARIKITRDSKDHTVSGNGLGIRIVGGKEIPGHSGEIGAYIAKILPGG<br>SAEQTGKLMEGMQVLEWNGIPLTSKTYEEVQSIISQQSGEAEICVRLDLNMLSDSE<br>N      |
| PDLIM1   | MTTQQIDLQGPWPWFRLVGGKDFEQPLAISRVTPGSKAALANLCIGDVITAIDGE<br>NTSNMTHLEAQNRIGCTDNLTLTVARSEHK                                        |
| PDLIM2   | MALTVDVAGPAPWGFRLTGGRDFHTPIMVTKVAER GKAKDADLRPGDIIVAINGE<br>SAEGLMHAEAQSKIRQSPSPLRLQLDRS                                         |
| PDLIM3   | MPQTVILPGPAPWGFRLSGGIDFNQPLVITRITPGSKAAAANLCPGDVILAIDGFGT<br>ESMTHADAQDRIKAAAHQLCLKIDRGETHLWSPQVSE                               |
| PDLIM4   | MPHSVTLRGPSWPWFRLVGGGRDFSAPLTISR VHAGSKAALAALCPGDLIQAINGES<br>TELMTHLEAQNRIGCHDHLTLSVSRP                                         |
| PDLIM5   | MSNYSVSLVGPAPWGFRLQGGKDFNMPLTISS LKDGGKAAQANVRIGDVVLSID<br>GINAQGMTHLEAQNKIKGCTGSLNMTLQRASAAPKPEP                                |
| PDLIM7   | MDSFKVVLEGPAPWGFRLQGGKDFNVPLSISRLTPGGKAAQAGVAVGDWVLSID<br>GENAGSLTHIEAQNKIRACGERLSLGLSRAQ                                        |
| PDZD11   | NNELTQFLPRTITLKKPPGAQLGFNIRGGKASQLGIFISKVIPDS DAHRAGLQEGDQ<br>VLAVNDVDFQDIEHKA VEILKTAREISMVRFFP                                 |
| PDZD2_1  | PEMEICTVYLTKE LGDTETVGLSFGNIPVFGDYGEKRRGGKKRKTHQGPVLDVGC<br>IWVTELKRN SPAGKSGKVRLRDEILSLNGQLMVGVDVSGASYLAEQCWNGGFIY<br>LIMLRRFKH |
| PDZD2_2  | REEVGRIWKME LLKESDGLGIQVSGGRGSKRSPHAIVVTQVKEGGAAHRDGRLSL<br>GDELLVINGHLLVGLSHEEA VAILRSATGMVQLVVASKENSAED                        |

|                     |                                                                                                                             |
|---------------------|-----------------------------------------------------------------------------------------------------------------------------|
| PDZD2_3             | PWRLIRPSVISIIGLYKEKGKGLGFSIAGGRDCIRGQMGI FVKTIFPNGSAAEDGRLK<br>EGDEILDVNGIPIKGLTFQEAHTFKQIRSGLFVLTVRTKLVSPLTPCSTP           |
| PDZD2_4             | KDRIVMEVTLNKEPRVGLGIGACCLALENSPPGIYIHSLAPGSVAKMESNLSRGDQ<br>ILEVNSVNRHAAALSKVHAILSKCPPGPVRLVIGRHPN                          |
| PDZD2_5             | KAQSENEEDVCFIVLNRKEGSGLGFSVAGGTDVEPKSITVHRVFSQGAASQEGTM<br>NRGDFLLSVNGASLAGLAHGNVLKVLHQAQLHKDALVVIKKGMDQPRPSARQE            |
| PDZD2_6             | RSVAVHDAALCVEVLKTSAGLGLSLDGGKSSVTGDGPLVIKRVYKGGAAEQAGIIE<br>AGDEILAIN GKPLVGLMHFDawnIMKSVPEGPVQLLIRKHRNSS                   |
| PDZD4               | PQEADRLDELEYEEVELYKSSHRDKLGLMVCYRTDDEEDLGIYVGEVNPNSIAAK<br>DGRIREGDRIIQINGVDVQNREEAVAILSQEENTNISLLVARPESQLAKRWKDS           |
| PDZD7_1             | DIIHSVRVEKSPAGRLGFSVRGGSEHGLGIFVSKVEEGSSAERAGLCVGDKITEVN<br>GLSLESTTMGSAVKVLTSSSRLHMMVRRMGRVP                               |
| PDZD7_2             | SDTSSSEDGVRRIVHLYTTSDDFCLGFNIRGGKEFGLGIYVSKVDHGGLAEENGIKV<br>GDQVLAANGVRFDISHSQAVEVLKGQTHIMLTIKETGRYPAYKEMVSEYCWLD<br>RLSNG |
| PDZD7_3             | GELKTVTL SKMKQSLGISISGGIESKVQPMVKIEKIFPGGA AFLSGALQAGFELVAV<br>DGENLEQVTHQRAVD TIRRAYRNKAREPMELVVRVPGPS                     |
| PDZD8               | KQRSSIKTVELIKGNLQSVGLTLRLVQSTDGYAGHVIIETVAPNSPAAIADLQRGD<br>RLIAIGGVKITSTLQVLKLIKQAGDRVLVYYERPVGQSNQGA VLQDN                |
| PDZD9               | HNLSKTQQTKLTVGSLGLGLIIQHGPYLQITHLIRKGAAANDGKLQPGDVLISVG<br>HANVLGYTLREFLQLQHITIGTVLQIKVYRDFINIP EEWQE                       |
| PDZRN3_1            | TKSLTLVLHRDSGSLGFNIIGRPSVDNHDGSSSEGIFVSKIVDSGPAAKEGGLQIH<br>DRIIEVNGRDLSRATHDQAVEAFKTAKEPIVVQVLRR                           |
| PDZRN3_2            | DIHQEMDREELEEEVDLYRMNSQDKLGLTVCYRTDDEDDIGIYISEIDPNSIAAK<br>DGRIREGDRIIQINGIEVQNREEAVALLTSEENKNFSLLIARPELQLDEGWMDDD          |
| PDZRN4_1            | HRRDGEHKPFTIVLERENDTLGFNIIGRPNQNNQEGTSTEGIYVSKILENGPADRA<br>DGLEIHDKIMEVNGKDL SKATHEEAVEAFRNAKEPIVVQVLRRTPLSR               |
| PDZRN4_2            | PADADRTEDFEYEEVELCRVSSQEKLGLTVCYRTDDEEDTGIYVSEVDPNSIAAKD<br>GRIREGDRI LQINGEDVQNREEAVALLSNDECKRIVLLVARPEIQLDEGWLEDE         |
| PICK1               | TVPGKVT LQKDAQNLIGISIGGGAQYCPCLYIVQVFDNTPAALDGTVAAGDEITGV<br>NGRSIKGKTKVEVAKMIQEVKGEVTIHYNKLQADPKQ                          |
| PPP1R9A             | KLELFPVELEKDEDGLGISIIGMGVGADAGLEKLGIFVKT VTEGGAAQRDGRIQVN<br>DQIVEVDGISLVGVTQNF AATVLRNTKGNVRVFIGREKP                       |
| PPP1R9B             | RLELFPVELEKDSEGLGISIIGMGAGADMGLEKLGIFVKT VTEGGAAHRDGRIQVN<br>DLLVEVDGTSLVGVTQSFAASVLRNTKGRVRFMIGRER                         |
| PREX1_1             | NKQLRNDFKLVENILAKRLLILPQEEDYGFDIEEKNAVVVKS VQRGSLAEVAGL<br>QVGRKIYSINEDLVFLRPFSEVESILNQSFCSRRLRLLVATKAKEI IKIPDQPD          |
| PREX1_2             | ATKAKEI IKIPDQPD TLCFQIRGAAPPYVYAVGRGSEAMAAGLCAGQCILKVNGSN<br>VMNDGAPEVLEHFQAFRSRREEALGLYQ                                  |
| PREX2_1<br>(DEPDC2) | HDLKVVENVIAKSLLIKSNEGSGYGFLEDKNKVPIIKLVEKGSNAEMAGMEVGKK<br>IFAINGDLVFM RPFNEVDCFLK SCLNSRKPLRVLVSTKPRE                      |

|          |                                                                                                                                |
|----------|--------------------------------------------------------------------------------------------------------------------------------|
| PREX2_2  | PLRVLVSTKPRETVKIPDSADGLGFQIRGFGPSVVHAVVGRGTVAAAAGLHPGQCII<br>KVNGINVSKEATHASVIAHVTACRKYRRPTKQDSIQWVYNSIESAQEDLQKSHSKP          |
| PRX      | MEARSRSAEELRRAELVEIIVETEAQTGVSGINVAGGGKEGIFVRELREDSIPAARSL<br>SLQEGDQLLSARVFFENFKYEDALRLLQCAEPYKVSFCLKRTVPTGDLALRPGTV<br>SG    |
| PSCDBP   | RSSSLSDFSWSQRKLVTVVEKQDNETFGFEIQSYRPQNNACSSSEMFTLICKIQEDSP<br>AHCAGLQAGDVLANINGVSTEGFTYKQVVDLIRSSGNLLTIETLNGT                  |
| PSMD9    | KEKQARDMAEAHKEAMSRKLGQSESQGPPRAFAKVNISISPGSPASIAGLQVDDEI<br>VEFGSVNTQNFQSLHNIGSVVQHSEGKPLNVTVIRRGKEHQRLVPTRWAGKGLL<br>GCNIPLQR |
| PTPN13_1 | SSPEREITLVNLKKDAKYGLGFQIIGGEKMGRLDLGIFISSVAPGGPADLDGCLKPG<br>DRLISVNSVSLEGVSHHAAIEILQNAPEDVTLVISQPKKISKVPST                    |
| PTPN13_2 | KPGDIFEVELAKNDNSLGISVTVLFDKGGVNTSVRHGGIYVKAVIPQGAAESDGRI<br>HKGDRVLAVNGVSLEGATHKQAVETLRNTGQVVHLLLEKGQSP                        |
| PTPN13_3 | TEENTFEVKLFKNSSGLGFSFSREDNLIPEQINASIVRVKKLFPGQPAAESGKIDVG<br>DVILKVNGASLKGLSQQEVISALRGTAPEVFLLLCRPPPG                          |
| PTPN13_4 | EDFELEVELLITLIKSEKGS LGFTVTKGNQRIGCYVHDVIQDPAKSDGRLKPGDRLI<br>KVNDTDVTNMTHTDVAVNLLRAASKTVRLVIGRVLELPR                          |
| PTPN13_5 | PMLPHLLPDITLTCNKEELGFSLCGGHDSLYQVVYISDINPRSVAAIEGNLQLLDVI<br>HYVNGVSTQGMTLEEVRALDMSLPSLVLKATRNDLPVVPSS                         |
| PTPN3    | DSYLVLIRITPDEDGKFGFNLKGGVDQKMPLVVSRLNPESPADTCIPKLNEDQQIVL<br>INGRDISEHTHDQVVMFIKASRESHSRELALVIRRR                              |
| PTPN4    | DNLVLIRMKPDENGRFGFNVKGGYDQKMPVIVSRVAPGTPADLCVPRLNEGDQV<br>VLINGRDIAEHTHDQVVLFIKASCERHSGELMLLVRP                                |
| RADIL    | YVFTVELERGPSGLGMGLIDGMHHLGAPGLYIQTLLPGSPAAADGRLSLGDRILE<br>VNGSSLLGLGYLRAVDLIRHGGKKMRFLVAKSDVETAKKIHFRTPPL                     |
| RAPGEF2  | NIACAAKAKRRLMTLTKPSREAPLPFILLGGSEKGFIFVDSVDSGSKATEAGLKR<br>GDQILEVNGQNFENIQLSKAMEILRNNTLSITVKTNLVVFKE                          |
| RAPGEF6  | KAKWRQVVLQKASRESPLQFSLNNGSEKGFIFVEGVEPGSKAADSGLKRGDQIM<br>EVNGQNFENITFMKAVEILRNNTLSITVKTNLVVFKE                                |
| RGS12    | RAGEASKRPLPGSPPRVRSVEVARGRAGYGFTLSGQAPCVLSCVMRGSPADFGV<br>LRAGDQILAVNEINVKKASHEDVVKLIGKCSGVLHMVIAEGVGRFESCSSDEEGG<br>LYEGKGWLK |
| RGS3     | SERRYRQITIPRGKDGFGFTICDSPVRVQAVDSGGPAERAGLQQLDTVLQLNERP<br>VEHWKCVELAHEIRSCPSEIILLVWRMVPQ                                      |
| RHPN1    | AKNRWRLVGPVHLTRGEGGFGLTLRGDSPVLIAAVIPGSQAAAAGLKEGDYIVSV<br>NGQPCRWWRHAEVVTELKAAGEAGASLQVVSLLPSSRLPSLGDR                        |
| RHPN2    | SANKRWTPPRSIRFTAEEGDLGFTLRGNAPVQVHFLDPYCSASVAGAREGDYIVSI<br>QLVDCKWLTLSSEVMKLLKSFGEDIEIMKVVSLLDSTSSMHNKSAT                     |
| RIMS1    | PVTWQPSKEGDRILIGRVILNKRTTMPKDSGALLGLKVVGGMKMTDLGRLGAFITKV<br>KKGSLADVVGHLRAGDEVLEWNGKPLPGATNEEVYNIILESKSEPQVEIIVSRP            |

|          |                                                                                                                             |
|----------|-----------------------------------------------------------------------------------------------------------------------------|
| RIMS2    | HSHSDKHPVTWQPSKDGDRILGRILLNKRLKDGSVPRDSGAMLGLKVVGGKMTESGRLCAFITKVKKGSLADTVGHLRPGDEVLEWNGRLLQGATFEEVYNIILESKPEPQVELVVSRIPIGD |
| SCRIB_1  | EPARIEEEELTLTLRQTGGLGISIAGGKGSTPYKGDDEGIFISRVSEEGPAARAGVRVGDKLLEVNGVALQGAEHHEAVEALRGAGTAVQMRVWRE                            |
| SCRIB_2  | RQRHVACLARSERGLGFSIAGGKGSTPYRAGDAGIFVSRIAEGGAHRAAGTLQVGDRVLSINGVDVTEARHDHAVSLLTAASPTIALLLERE                                |
| SCRIB_3  | PYPVEEIRLPRAGGPLGLSIVGGSDDHSSHPFGVQEPGVFISKVLPRLAARSGLRVGDRILAVNGQDVRDATHQEAVSALLRPCLELSLLVRRDP                             |
| SCRIB_4  | RRDPAPPGLRELICIQKAPGERLGISIRGGARGHAGNPRDPTDEGIFISKVSPTGAAGRDGRLRVGLRLLEVNGQSLGLTHGEAVQLLRSVGDTLTVLVCDGFEASTD                |
| SDCBP_1  | GIREVILCKDQDGKIGLRLKSIDNGIFVQLVQANSASPASLVGLRFGDQVLQINGENCAGWSSDKAHKVLKQAFGEKITMTIRDRPFERT                                  |
| SDCBP_2  | ERTITMHKDSTGHVGFIFKNGKITSIVKDSSAARNGLLTEHNICEINGQNVIGLKDSQIADILSTSGTVVTITIMPA                                               |
| SDCBP2_1 | KPGVREIHLCKDERGKTGLRLRKVDQGLFVQLVQANTPASLVGLRFGDQLLQIDGRDCAGWSSSHKAHQVVKKASGDKIVVVVRDRPFQRT                                 |
| SDCBP2_2 | RPFQRTVTMHKDSMGHVGFVIKKGKIVSLVKGSSAARNGLLTNHYVCEVDGQNVIGLKDKKIMEILATAGNVVTLTIIPSVIYEH                                       |
| SHANK1   | SDYIIKEKTVLLQKKDSEGFVLRGAKAQTPIEEFTPTPAFPALQYLESVDEGGVAWRAGLRMGDFLIEVNGQNVVKVGHQRQVVMIRQGGNTLMVKVVMVTRHPD                   |
| SHANK2   | SDCIIEEKTVVLQKKDNEGFGFVLRGAKADTPIEEFTPTPAFPALQYLESVDEGGVAWQAGLRTGDFLIEVNNENNVVKVGHQRQVVMIRQGGNHLVLKVVTVTRNLDP               |
| SHANK3   | HSDYVIDDKVAVLQKRDHEGFGFVLRGAKAETPIEEFTPTPAFPALQYLESVDVEGVAVWRAGLRTGDFLIEVNGVNVVKVGHKQVVALIRQGGNRLVMKVVSVTRKPEE              |
| SHROOM2  | DGGRLVEVQLSGGAPWGFTLKGGREHGEPLVITKIEEGSKAAAVDKLLAGDEIVGINDIGLSGFRQEAICLVKGSHTLKL VVKRRSE                                    |
| SHROOM3  | TKGRYIYLEAFLEGGAPWGFTLKGGLEHGEPLIISKVEEGGKADTLSSKLQAGDEVVHINEVTLSSSRKEAVSLVKGSYKTLRLVVRDRVCTD                               |
| SHROOM4  | SFQYVPVQLQGGAPWGFTLKGGLEHCEPLTVSKIEDGGKAALSQKMRTGDELVNI NGTPLYGSRQEALILIKGSFRILKLIVRRRNAPV                                  |
| SIPA1    | CETRELALPRDGQGRLGFEVDAEGFVTHVERFTFAETAGLRPGARLLRVCGQTLP SLRPEAAAQLLRSAPKVCVTVLPPDES                                         |
| SIPA1L1  | SKGCESVEMTLRRNGLGQLGFHVNYEGIVADVEPYGYAWQAGLRQGSRLVEICK VAVATLSHEQMIDLLRTSVTVKVVIIPPHDD                                      |
| SIPA1L2  | TRGCETVEMTLRRNGLGQLGFHVNFEGIVADVEPFGFAWKAGLRQGSRLVEICK VAVATLTHEQMIDLLRTSVTVKVVIIPPHDD                                      |
| SIPA1L3  | TSGWETVDMTLRRNGLGQLGFHVKYDGTVAEVEDYGFAWKAGLRQGSRLVEICK VAVVTLTHDQMIDLLRTSVTVKVVIIPPFED                                      |
| SNTA1    | QRRRVTVRKADAGGLGISIKGGRENKMPILISKIFKGLAADQTEALFVGDAILSVN GEDLSSATHDEAVQVLKKTGKEVVLEVKYMKD                                   |

|         |                                                                                                                               |
|---------|-------------------------------------------------------------------------------------------------------------------------------|
| SNTB1   | SNQKRGVKVLKQELGGLGISIKGGKENKMPILISKIFKGLAADQTQALYVGDAILS<br>VNGADLRDATHDEAVQALKRAGKEVLLLEVKYMRE                               |
| SNTB2   | PVRRVRVVKQEAGGLGISIKGGRENRMPIISKIFPGLAADQSRLRLGDAILSVNG<br>TDLRQATHDQAVQALKRAGKEVLLLEVKFIRE                                   |
| SNTG1   | GERTVTIRRQTVGGFGLSIKGGAEHNIPVVVSKISKEQRAELSGLLFIGDAILQINGI<br>NVRKCRHEEVVQVLRNAGEEVTTLTVSFLKRAP                               |
| SNTG2   | NRRTVTLRRQPVGGLGLSIKGGSEHNVPVVISKIFEDQAADQTGMLFVGDAVLQV<br>NGIHVENATHEEVVHLLRNAGDEVTITVEYLREAP                                |
| SNX27   | GPRVVRIVKSESGYGFNVRGQVSEGGQLRSINGELYAPLQHVSAPVLPGGAADRAG<br>VRKGDRILEVNVHVNVEGATHKQVVDLIRAGEKELILTVLSVPPHEAD                  |
| STXB4   | EKDPAFQMITIAKETGLGLKVLGGINRNEGPLVYIQEIIPGGDCYKDGRLKPGDQL<br>VSVNKESMIGVSFEEAKSIITGAKLRLESASWEIAFIRQKSDN                       |
| SYNJ2BP | DYLVTEEEINLTRGPSGLGFNIVGGTDQQYVSNDSGIYVSRIKENGAAALDGRLQE<br>GDKILSVNGQDLKNLLHQDAVDLFRNAGYAVSLRVQHRLQVQ                        |
| SYNP2   | GTGDFICISMTGGAPWGFRLQGGKEQKQPLQVAKIRNQSKASGSLCEGDEVVSI<br>NGNPCADLTYPEVIKLMESITDSLQMLIKRPSSG                                  |
| SYNPO2L | MGAEEEVLVTLSGGAPWGFRLHGGAEQRKPLQVSKIRRRSQAGRAGLRERDQLL<br>AINGVSCTNLSHASAMSLIDASGNQLVLTQRLAD                                  |
| TIAM1   | EIEICPKVTQSIHIEKSDTAADTYGFSLSVEEDGIRRLYVNSVKETGLASKKGLKA<br>GDEILEINNRAADALNSSMLKDFLSQPSLGLLVRTYPELEEGVE                      |
| TIAM2   | YDEIEVFPLNVYDVQLTKTGSVCDGFAVTAQVDERQHLSRIFISDVLPDGLAYGE<br>GLRKGNEIMTLNGEAVSDLDLKQMEALFSEKSVGLTLIARPPDTKAT                    |
| TJP1_1  | EETAIWEQHTVTLHRAPGFGFGIAISGGRDNPHFQSGETSIVISDVLKGGPAEGQLQ<br>ENDRVAMVNGVSMDNVEHAFQVQLRKSGKNAKITIRRKKKVQ                       |
| TJP1_2  | PTKVTLVKSARKNEEYGLRLASHIFVKEISQDSLAAARDGNIQEGDVVLKINGTVTEN<br>MSLTDKTLIERSKGKCLKMVVQRDE                                       |
| TJP1_3  | DGILRPSMKLVKFRKGDSVGLRLAGGNDVGIFVAGVLEDSPAAKEGLEEGDQILR<br>VNVDFTNIIREEAVLFLDLPKGEEVTILAQKKKD VYRRIVESDVG                     |
| TJP2_1  | MEELIWEQYTVTLQKDSKRGFGIAVSGGRDNPHFENGETSIVISDVLPGGPADGGL<br>QENDRVVMVNGTPMEDVLHSFAVQQLRKSGKVAIVVKRPRKVQVAALQ                  |
| TJP2_2  | RGRPGPIGVLLMKSRANEEYGLRLGSQIFVKEMTRTGLATKDGNLHEGDILKING<br>TVTENMSLTDARKLIEKSRGKLQLVVLDRDSQQT                                 |
| TJP2_3  | EDEAIYGPNTKMFVRFKKGDSVGLRLAGGNDVGIFVAGIQEGTSAEQEGLQEGDQI<br>LKVNTQDFRGLVREDAVLILLEIPKGEMVTILAQSRADVYRD                        |
| TJP3_1  | MEELTIWEQHTATLSKDPRRGFGIAISGGDRPGGSMVVSVDVPGGPAEGRLQTG<br>DHIVMVNGVSMENATSFAIQILKTCTKMANITVKRPRRIHLPATKASPSSPGR               |
| TJP3_2  | QMKPVKSVLVKRRDSEEFVVKLGSQIFIKHITDSGLAARHRGLQEGDLILQINGVS<br>SQNLSLNDTRRLIEKSEGKLSLLVLRDRGQ                                    |
| TJP3_3  | EDRGYSPDTRVVRFLKGKSIGLRLAGGNDVGIFVSGVQAGSPADGGQIQEGDQIL<br>QVNDVPFQNLTREEAVQFLLGLPPGEEMELVTQRKQDIFWKMVQSRVGDSSFYIRT           |
| TX1B3   | QPVTAVVQRVEIHKLRQGENLILGFSIGGGIDQDPSQNPFSEDKTDKGIYVTRVSEG<br>GPAEIALQIGDKIMQVNGWDMTMVTHDQARKRLTKRSEEVVRLLVTRQSLQKA<br>VQQSMLS |

|         |                                                                                                                  |
|---------|------------------------------------------------------------------------------------------------------------------|
| USH1C_1 | DQLTPRRSRKLKEVRLDRLHPEGLGLSVRGGLEFGCGLFISHLIKGGQADSVGLQV<br>GDEIVRINGYSISSCTHEEVINLIRTKKTVSIKVRHIGLIPVKSSPDE     |
| USH1C_2 | KEKKVFISLVGSRGLGCSISSGPIQKPGIFISHVKPGSLSAEVGLEIGDQIVEVNGVD<br>FSNLDHKEAVNVLKSSRSLTISIVAAAGRELFMT                 |
| USH1C_3 | SMFTPEQIMGKDVRLRLRIKKEGSLDLAEGGVDSPIGKVVVSAVYERGAAERHGG<br>IVKGDEIMAIN GKIVTDYTLAEAEALQKAWNQGGDWIDLVVAVCPPKEYDDE |

Individual single PDZ domains used as prey in the Y2H screens. Note that the clones presented with another name in the previous version of the PDZome are indicated in gray (in parentheses) below the name used in the present version.



**Table S2 PDZ constructs used as preys to comprehensively map PDZ interactions.**

| PDZ tandem name | Protein Sequence                                                                                                                                                                                                                                                   |
|-----------------|--------------------------------------------------------------------------------------------------------------------------------------------------------------------------------------------------------------------------------------------------------------------|
| APBA1_1-2       | EFKDVFIKQKGEILGVVIVESGWGSILPTVIIANMMHGGPAEKSGKLNIGDQIMSINGT<br>SLVGLPLSTCQSIKGLKNQSRVKLNIVRCPPVTTVLIRRPDLRYQLGFSVQNGIICSLMR<br>GGIAERGGVRVGHRIIEINGQSVVATPHEKIVHILSNAVGEIHMKTMPA                                                                                   |
| APBA2_1-2       | NCKELQLEKHKGEILGVVVVESGWGSILPTVILANMMNGGPAARSGKLSIGDQIMSIN<br>GTSLVGLPLATCQGIKGLKNQTQVKLNIVSCPPVTTVLIKRPDLKYQLGFSVQNGIICS<br>LMRGGIAERGGVRVGHRIIEINGQSVVATAHEKIVQALSNSVGEIHMKTMPAA                                                                                 |
| APBA3_1-2       | DNCREVHLEKRRGEGLGVALVESGWGSLLPTAVIANLLHGGPAERSGALSIGDRLTAI<br>NGTSLVGLPLAACQAAVRETKSQTSVTLIVHCPVTTAIIHRPHAREQLGFCVEDGIICS<br>LLRGGIAERGGIRVGHRIIEINGQSVVATPHARIIELLTEAYGEVHIKTMPAATYRLLTG<br>Q                                                                     |
| DFNB31_1-2      | GEVRLVSLRRAKAHEGLGFSIRGGSEHGVGIYVSLVEPGSLAEKEGLRVGDQILRVND<br>KSLARVTHAEAVKALKGSKKLVLVYSAGRIPGGYVTNHIYTWVDPQGRSISPPSGLP<br>QPHGGALRQQEGDRRSTLHLLQGGDEKKVNLVLGDGRSLGLTIRGGAEYGLGIYITGV<br>DPGSEAEGSGLKVGDDQILEVNGRSFLNILHDEAVRLLKSSRHILTVKDVGRLPARTT<br>VDETKWIASSR |
| DLG1_1-2        | EYEEITLERGNSGLGFSIAGGTDNPHIGDDSSIFITKIITGGAAAQDGRRLRVNDCILRVNE<br>VDVRDVTHSKAVEALKEAGSIVRLYVKRRKPVSEKIMEIKLIKGPGLGFSIAGGVGN<br>QHIPGDNSIYVTKIIEGGAHKDGKLQIGDKLLAVNNVCLEEVTHEEAVTALKNTSDF<br>VYLKVAKPTSMYMND                                                        |
| DLG2_1-2        | EYEFEEITLERGNSGLGFSIAGGTDNPHIGDDPGIFITKIIPGGAAAEDGRRLRVNDCILRV<br>NEVDVSEVSHSKAVEALKEAGSIVRLYVRRRRPILETVVEIKLFKGPGLGFSIAGGVG<br>NQHIPGDNSIYVTKIIDGGAAQKDGRLLQVGDRLLMVNNYSLEEVTHEEAVAILKNTSE<br>VVYLKVGKPTTIY                                                       |
| DLG3_1-2        | DGMFKYEEIVLERGNSGLGFSIAGGIDNPHVPDDPGIFITKIIPGGAAAMDGRLLGVNDC<br>VLRVNEVDVSEVVHSRAVEALKEAGPVVRLVRRRRQPPPETIMEVNLLKGPGLGFSI<br>AGGIGNQHIPGDNSIYITKIIEGGAQKDGRLLQIGDRLLAVNNTNLQDVRHEEAVASLK<br>NTSDMVYLKVAKPGS                                                        |
| DLG4_1-2        | EYEEITLERGNSGLGFSIAGGTDNPHIGDDPSIFITKIIPGGAAAQDGRRLRVNDSILFVNE<br>VDVREVTTHSAAVEALKEAGSIVRLYVMRRKPPEAEKVMKLIKGPGLGFSIAGGVGN<br>QHIPGDNSIYVTKIIEGGAHKDGRLQIGDKILAVNSVGLEDVMHEDAVAALKNTYDV<br>VYLKVAKPSNA                                                            |
| DLG5_1-2        | ETEVVEFERETEDIDLKALGFDMAEGVNEPCFPGDCGIFVTKVDKGSADGRRLRVNDW<br>LLRINDVDLINKDKKQAIKALLNGEGAINMVRRRKSLLGGKVVTPLHINLSGQKDSGIS<br>LENGVYAAAVLPGSPAAGEGSLAVGDRIVAINGIALDNKSLNECESLLRSCQDSLTLSL<br>LKVFPQSS                                                               |
| GRIP1_1-2       | EFGGSTVVELMKKEGTTLGLTVSGGIDKDGPVSNLRQGGIAARSDQLDVGDYIKA<br>VNGINLAKFRHDEIISLLKNVGERVVLEVEYELPPVSVQGSSVIFRTVEVTLHKEGNTFG<br>FVIRGGAHDDRNRKSRPVVITCVRPGGPADREGTIKPGDRLLSVDGIRLLGTTHAEAMSI<br>LKQCGQEAALLIEYDVS                                                       |
| GRIP1_2-3       | SVIFRTVEVTLHKEGNTFGFVIRGGAHDDRNRKSRPVVITCVRPGGPADREGTIKPGDRL<br>LSVDGIRLLGTTHAEAMSILKQCGQEAALLIEYDVSMDSVATASGPLLVEVAKTPGA<br>SLGVALTTSMCCNKQVIVIDKIKSASIADRCGALHVGDHILSIDGTSMEYCTLAETQF<br>LANTTDQVKLEILPHHQTRLALKG                                                |
| GRIP1_4-5       | QVVHTETTEVLTADPVTGFGIQLQGSVFATETLSSPPLISYIEADSPAERCGVLQIGDR<br>VMAINGIPTEDSTFEEASQLLRDSSITSKVTLIEFDVAESVIPSSGTFHVKLPPKHVEL<br>GITISSPSSRKPGDPLVISDIKKSVAHRTGTLELGDKLLAIDNIRLDNCSMEDAVQILQQ<br>CEDLVKLKIRKDED                                                       |
| GRIP1_5-6       | ESVIPSSGTFHVKLPPKHVELGITISSPSSRKPGDPLVISDIKKSVAHRTGTLELGDKL<br>LAIDNIRLDNCSMEDAVQILQQCEDLVKLKIRKDEDNSDEQESSGAIITYVELKRYGGP<br>LGITISGTEEPDPIIISSLTKGGLAERTGAIHIGDRILAINSSSLKGKPLSEAIHLLQMAE<br>TVTLKIKKQTDASASS                                                    |
| GRIP2_1-2       | EEFRGITVVELIKKEGSTLGLTISGGTDKDGKPRVSNLRPGGLAARSDLLNIGDYIRSVN<br>GIHLTRLRHDEIITLLKNVGERVVLEVEYELPPPAPENNPRIISKTVDVSLYKEGNSFGFV                                                                                                                                      |

|            |                                                                                                                                                                                                                                                                             |
|------------|-----------------------------------------------------------------------------------------------------------------------------------------------------------------------------------------------------------------------------------------------------------------------------|
|            | LRGGAHEDGHKSRPLVLTYYVRPGGPADREGSLKVGDRLLSVDGIPLHGASHATALATL<br>RQCSHEALFQVEYDVATPDTVANASG                                                                                                                                                                                   |
| GRIP2_2-3  | ENNPRIISKTVDSLYKEGNSFGFVLRRGGAHEDGHKSRPLVLTYYVRPGGPADREGSLK<br>VGDRLLSVDGIPLHGASHATALATLRQCSHEALFQVEYDVATPDTVANASGPLMVEIV<br>KTPGSALGISLTTTSLRNKSVITIDRIKPASVVDRSGALHPGDHILSIDGTSMEHCSSL<br>TKLLASISEKVRLEILPVPQSORPLR                                                      |
| GRIP2_4-5  | GGQIVHTETTEVVLCDPLSGFGLQLQGGIFATETLSSPPLVCFIEPDSPAERCGLLQVG<br>DRVLSINGIATEDGTMEEANQLLRDAALAHKVVEFEFVAESVIPSSGTFHVKLPPK<br>RSVELGITISSASRKRGEP LIISDIKKGSVAHRTGTLEPGDKLLAIDNIRLDNCPMEDAVQ<br>ILRQCEDLVKLKIRKDED                                                             |
| GRIP2_5-6  | DVAESVIPSSGTFHVKLPPKRSVELGITISSASRKRGEP LIISDIKKGSVAHRTGTLEPGD<br>KLLAIDNIRLDNCPMEDAVQILRQCEDLVKLKIRKDEDNSDELETTGAVSYTVELKRY<br>GGPLGITISGTEEPFDPIVISGLTKRGLAERTGAIHVGDRI LAINNVSLKGRPLSEAIHLLQ<br>VAGETVTLKIKKQLDR                                                         |
| INADL_1-2  | KLGNEDFNSVIQQMAQGRQIEYIDIERPSTGGLGFSVVALRSQNLGKVDIFVKDVQPGS<br>VADRDQRLKENDQILAINHTPLDQNISHQQAIAL LQQTGSLRLIVAREPVHTKSSTSS<br>LNDTTLPETVCWGHVVEEVELINDGSGLGFGIVGGKTSGVVVRTIVPGGLADRDGRLQT<br>GDHILKIGGTNVQGMTSEQVAQVLRNCGNSVRMLVARDPAGDISVT                                 |
| INADL_2-3  | PETVCWGHVVEEVELINDGSGLGFGIVGGKTSGVVVRTIVPGGLADRDGRLQTGDHILK<br>IGGTNVQGMTSEQVAQVLRNCGNSVRMLVARDPAGDISVTTPAPAALPVALPTVASK<br>PGSDSSLFETY NVELVRKDGQSLGIRIVGYVGTSHTEASGIYVKSIIPGSAA YHNHGI<br>QVNDKIVAVDGVNIQGFANHDVVEVLRNAGQVVHLTLVRRKTSSTSPLEPPSDRGT                        |
| INADL_4-5  | DTQIADDAELQKYSKLLPIHTLRLGVEVDSFDGHHYISSIVSGGPVDTLGLLQPEDELLE<br>VNGMQLYGKSRREAVSFLKEVPPFTLVCCRRLFDD EASVDEPRRTETSLPETEVDHN<br>MDVNTEEDDDGELALWSPEVKIVELVKDCKGLGFSILDYQDPLDPTRSVIVIRSLVAD<br>GVAERSGGLLPGDRLVSVNEYCLDNTSLAEAVEILKAVPPGLVHLGICKPLVEDNEEE                      |
| INADL_8-9  | PATCPIVPGQEMIIEISKGRSGLGLSIVGGKDTPLNAIVIHEVYEEGAAARDGRLWAGD<br>QILEVNGVDLRNSSHEEAITALRQTPQKVRLV VYRDEAHYRDEENLEIFPVDLQKKAG<br>RGLGLSIVGKRNGSGVFISDIVKGGAADLDGRLIQGDQILSVNGEDMRNASQETVATIL<br>KCAQGLVQLEIGRLR                                                                |
| LNx1_1-2   | PRLYHLIPDGEITSIKINRVDPSLSIRLVGGSETPLVHIIIQHIIYRDGVIARDGRLLPGDII<br>LKVNGMDISNVPHNYAVRLLRQPCQVLWLTVMREQKFRSRNNGQAPDAYRPRDDSF<br>HVILNKSSPEEQLGIKLVKRVDEPGVFIFNVLDGGVAYRHGQLEENDRVLAINGHDLR<br>YGPESA AHLIQASERRVHLVVSQRQVRQSPD                                               |
| LNx2_1-2   | PLSLPEGEITIEIHRSNPYIQLGISIVGGNETPLINIVIQEVYRDGVIARDGRLLAGDQILQ<br>VNNYNISNVSHNYARAVLSQPCNTLHLTVLRERRFGNRAHNHSDSNSPREEIFQVALH<br>KRDSGEQLGIKLVRRRTDEPGVFILDLLEGGLAAQDGRLLSSNDRVLAINGHDLKYGTPE<br>LAAQIIQASGERVNLTIARPGKPQP                                                   |
| MPDZ_1-2   | DEFDQLIKNMAQGRHVEVFELLKPPSGGLGFSVVGLRSENREGELGIFVQEIQEGSV AHR<br>DGRLKETDQILAINGQALDQTITHQQAISILQKAKDTVQLVIARGSLPQLVSPIVSRSPSA<br>ASTISAHSNPVHWQHMETIELVNDGSGLGFGIIGGKATGVIVKTILPGGVADQHGR LCS<br>GDHILKIGD TDLAGMSSEQVAQVLRQCGRNVKLM IARGAIEERT                            |
| MPDZ_8-9   | DKEDEFGYSWKNI RERYGTLTGELHMEIELEKGHSGLSLAGNKDRSRMSVFIVGIDP<br>NGAAGKDGRLLQIADELLEINGQILYGRSHQNASSIIKCAPSKVKIIFIRNKDAVNQMAV<br>CPGNAVEPLPSNSEN LQNKETEPTVTTSDAAVDLSSFKNVQHLELPKDQGGGLGIAISEE<br>DTLSGVIKSLTEHGVAATDGRLLKVG DQILAVDDEIVVGYPIEFISLLKTAKMTVKLTI<br>HAENPDSQAVPS |
| MPDZ_10-11 | PGCETTIEISKGRGTGLGLSIVGGSDTLGAIHHEVYEEGAACKDGRLWAGDQILEVNGI<br>DLRKATHDEAINVLRQTPQRVRLTYRDEAPYKEEEVCDTLTIELQKKPGKGLGLSIVG<br>KRNDTG V FVS DIVKGGIADADGRLLMQGDQILMVNGEDVRNATQEAVAALLKCSLGT<br>VTEVGRIKAGP                                                                    |
| NHERF3_2-3 | QPRLCYLVEGGSYGFS LKTVQGKGKGVYMTDITPQGVAMRAGVLADDH LIEVNGEN<br>VEDASHEEVVEKVKKSGSRVMFLLVDKETDKRHVEQKIQFKRETASLKLPHQPRIVE<br>MKKGSNGYGFYLRAGSEQKGQIIKDIDSGSPAEEAGLKNNDLVVAVNGESVETLDHD<br>SVVEMIRKGGDQTSLLVVDKETDNMYR                                                         |
| NHERF4_1-2 | DPYDPWSLERPRFCLLSKEEGKSFGFHLQQELGRAGHV VCRVDPGTS AQRQGLQEGD<br>RILAVNNDVVEHEDYAVVVRIRASSPRVLLTVLARHAHDVARAQLGEDAHL CPTLG<br>PGVRPRLCHIVKDEGGFGFSVTHGNQGPFWLV LSTGGAAERAGVPPGARLLEVNGVS<br>VEKFTHNQLTRKLWQSGQQVTLLVAGPEVEEQCR                                                |

|                 |                                                                                                                                                                                                                                                     |
|-----------------|-----------------------------------------------------------------------------------------------------------------------------------------------------------------------------------------------------------------------------------------------------|
| PARD3B_2-3      | NKNAKKIKIDLKKGPEGLGFTVVTRDSSIHGPGPIFVKNILPKGAAIKDGRLQSGDRILE<br>VNGRDVTGRTQEELVAMLRSTKQGETASLVIARQEGHFLPRELKGEPCCALSLTSE<br>QLTFEIPLNDSSAGLGVSLKGNKSRETGTDLGIFIKSIHGGAAFKDGRLRMNDQLIAV<br>NGESLLGKSNHEAMETLRRSMSMEGNIRGMIQLVILRRPER                 |
| PDZD2_5-6       | KAQSENEEDVCFIVLNRKEGSLGFSVAGGTDVEPKSITVHRVFSQGAASQEGTMNRG<br>DFLLSVNGASLAGLAHGNVLKVLHQAQLHKDALVVIKKGMDQPRPSARQEPPTANG<br>KGLLSRKTIPLPGIGRSVAVHDAALCVELKTSAGLGLSLDGGKSSVTGDGPLVIKRVY<br>KGGAAEQAGIIEAGDEILAINGKPLVGLMHFDAWNIMKSVPEGPVQLLIRKHRNSS     |
| PDZD7_1-2       | DIHSVRVEKSPAGRLGFSVRGGSEHGLGIFVSKVEEGSSAERAGLCVGDKITEVNGLSL<br>ESTTMGSAVKVLTSSSRLHMMVRRMGRVPGIKFSKEKTTWVDVNNRRLVVEKCGSTP<br>SDTSSDGDVRRIVHLYTTSDDFCLGFNIRGGKEFGLGIYVSKVDHGGLAEEENGIVGDQ<br>VLAANGVRFDISHSQA VEVLKGQTHIMLTIKETGRYPAYKEMVSEYCWLDRLSNG |
| PREX1_1-2       | NKQLRNDFKLVENILAKRLLLPQEEDYGFIDIEEKNAVVVKSQVQRGSLAEVAGLQVG<br>RKIYSINEDLVFLRPFSEVESILNQSFCSRPLRLLVATKAKEIIPDQPDTLCFQIRGAA<br>PPYVYAVGRGSEAMAAGLCAGQCILKVNNGSNMNDGAPEVLEHFQAFRSRREEALGL<br>YQ                                                        |
| PREX2_1-2       | HDLKVVENVIKSLIKSNEGSYGFGLDKNKVPIIKLVEKGSNAEMAGMEVGKKIFAI<br>NGDLVFMRFNEVDCLKSCLSNRKPLRVLVSTKPRETVKIPDSADGLGFQIRGFGPSV<br>VHAVGRGTVAAGLHPGQCIIKVNGINVSKETHASVIAHVTACRKYRRPTKQDSIQW<br>VYNSIESAQEDLQKSHSKP                                            |
| PTPN13_4-5      | EDFELEVELLITLIKSEKSLGFTVTKGNQRIGCYVHDVIQDPAKSDGRLKPGDRLIKVN<br>DTDVTNMTHTDAVNLLRAASKTVRLVIGRVLELPRIPMLPHLLPDITLTCNKEELGFSL<br>CGGHDSLYQVYISDINPRSVAAIEGNLQLLDVIHYVNGVSTQGMTLEEVRALDMSL<br>PSLVLKATRNDLPVVPSS                                        |
| SCRIB_3-4       | LAAALEGPYPVEEIRLPRAGGPLGLSIVGSGDHSSHPFGVQEPGVFISKVLPRGLAARSG<br>LRVGDRLAVNGQDVRDATHQEAVSALLRPCLELSLLVRRDPAPPGLREL CIQKAPGE<br>RLGISIRGGARGHAGNPRDPTDEGIFISKVSPTGAAGRDGRLRVGLRLLEVNNQSSLGL<br>THGEAVQLLRVGDTLTVLVCDGFEASTDAALEVS                     |
| SCRIB_3-4_L     | PYPVEEIRLPRAGGPLGLSIVGSGDHSSHPFGVQEPGVFISKVLPRGLAARSGRLVGDRI<br>LAVNGQDVRDATHQEAVSALLRPCLELSLLVRRDPAPPGLREL CIQKAPGERLGISIRG<br>GARGHAGNPRDPTDEGIFISKVSPTGAAGRDGRLRVGLRLLEVNNQSSLGLTHGEAVQ<br>LLRSVGDTLTVLVCDGFEASTD                                |
| USH1C_1-2       | TPRRSRKLKEVRLDRLHPEGLGLSVRGGLEFGCGLFISHLIKGGQADSVGLQVGDIVR<br>INGYSSSCTHEEVINLIRTKKTVSIKVRHIGLIPVKSSPDEPLTWQYVDQFVSESGGVRG<br>SLGSPGNRENKEKKVFISLVGSRGLGCSISSGPIQKPGIFISHVKPGSLSAEVGLEIGDQIV<br>EVNGVDFSNDHKEAVNVLKSSRSLTISIVAAAGRELFMT             |
| SDCBP_1-2<br>§  | GIREVILCKDQDGKIGLRLKSIDNGIFVQLVQANSPASLVGLRFGDQVLQINGENCAGW<br>SSDKAHKVLKQAFGEKITMTIRDRPFERTERTITMHKDSSTGHVGFIFKNGKITSIVKDSS<br>AARNGLL TEHNICEINGQNVIGLKDSQIADILSTSGTVVTITIMPA                                                                     |
| SDCBP2_1-2<br>§ | KPGVREIHLCKDERGKTGLRLRKVDQGLFVQLVQANTPASLVGLRFGDQLLQIDGRD<br>CAGWSSHKAHQVVKKASGDKIVVVVRDRPFQRTTRPFQRTVTMHKDSMGHVGVFIKK<br>GKIVSLVKGSSAARNGLLTNHYVCEVDGQNVIGLKDKKIMEILATAGNVVTLTIIPSVI<br>YEH                                                        |

Tandem PDZ domains used as prey in the Y2H screens. Note that the tandems for Syntenin-1 and 2 are not present in Duhoo et al 2020 (§).
